# Supplementary material for: Cellulosic nanorods of various aspect ratios for oil in water Pickering emulsions
Source: Royal Society of Chemistry journal article supplement (doi:10.1039/c2sm26472b), 2012-11-21

## Atomic Force Microscopy images used to determine the thickness of the three sources of cellulose nanocrystals

### AFM setup and sample preparation

Measurements were performed with a Nanowizard II AFM on top of an inverted microscope (Eclipse Ti Nikon, Japan). The AFM stand-alone head is equipped with a linearized piezoelectric ceramic with a 15  $\mu\text{m}$  range and an infrared laser. Rectangular-shaped cantilevers (PPP-NCHR, Nanosensors) were used to intermittent contact mode imaging in air.

10  $\mu\text{L}$  of the suspension were deposited on top of a freshly cleaved mica surface and let dry for 30 minutes in a furnace thermally regulated (60°C).

### cotton cellulose nanocrystals

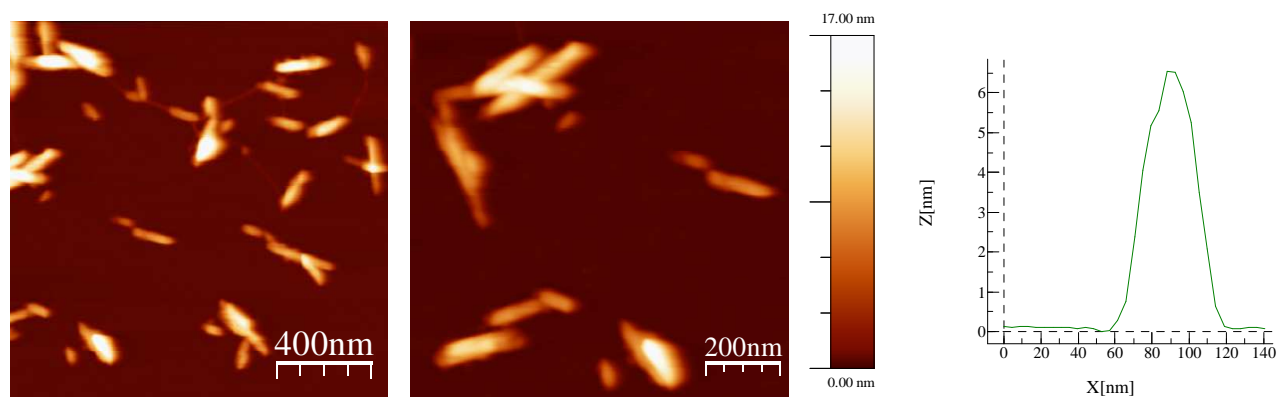

### bacterial cellulose nanocrystals

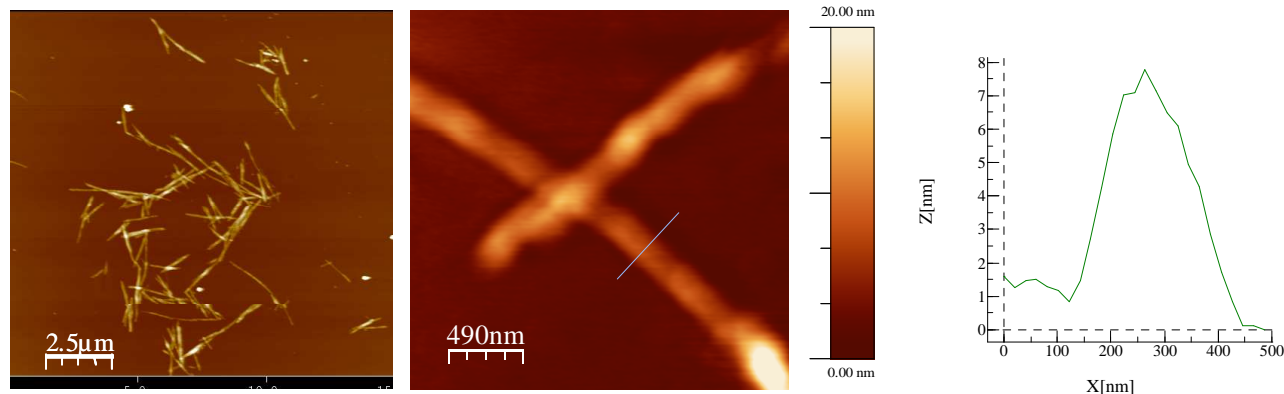

### cladophora cellulose nanocrystals

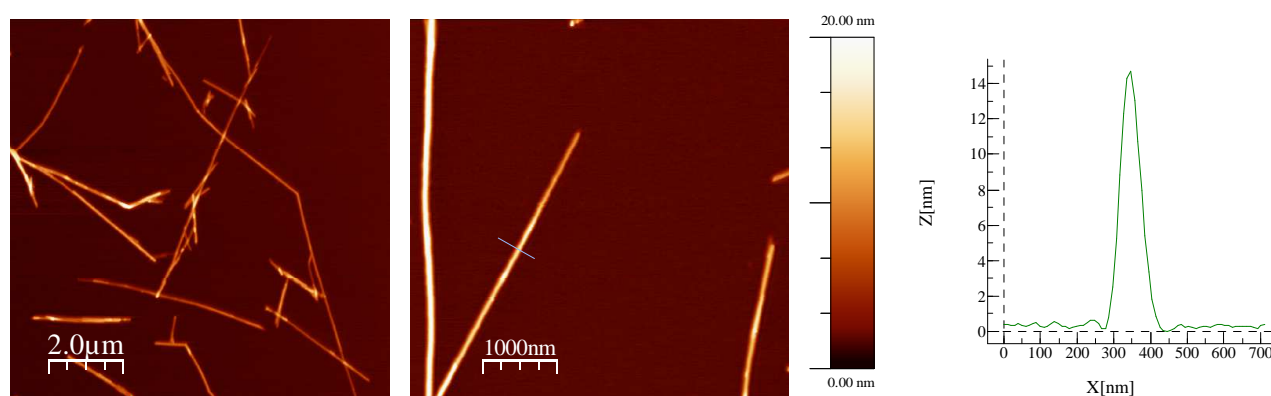

Supplement: c2sm26472b.pdf [file c2sm26472b.pdf]
